# Supplementary material
Source: Royal Society of Chemistry journal article supplement (doi:10.1039/d6ay00441e)
Supplement: d6ay00441e1.pdf [file d6ay00441e1.pdf]

## **Target-to-Signal Conversion and Spatial Enrichment Cascade Boosts**

### **CRISPR/Cas12a Biosensing for Trace-Level Pathogen Detection**

Yu Liu<sup>a, †</sup>, Xudong Yue<sup>b, †</sup>, Bowen Li<sup>b</sup>, Haoyu Yang<sup>a</sup>, Yu Wang<sup>b</sup>, Shenguang Ge<sup>a, c</sup>, Su Liu<sup>a, \*</sup>

<sup>a</sup>School of Water Conservancy and Environment, University of Jinan, Jinan 250022, P.R. China

<sup>b</sup>School of Biological Sciences and Technology, University of Jinan, Jinan 250022, P.R. China

<sup>c</sup>Jinan Engineering Research Center of Plant-Microbial Interaction, Jinan, 250022, P.R. China

† These authors contributed equally to this work

\*Corresponding author: Su Liu, [stu\\_lius@ujn.edu.cn](mailto:stu_lius@ujn.edu.cn)

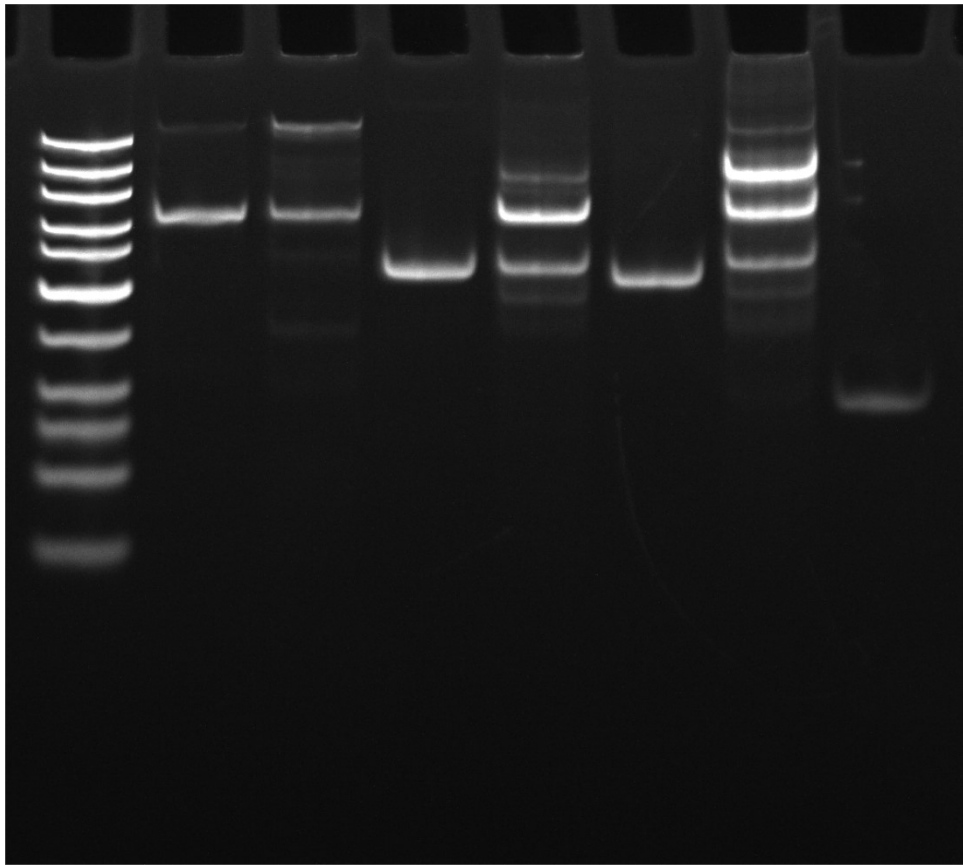

**Fig. S1.** The original image of Figure 2A in the paper

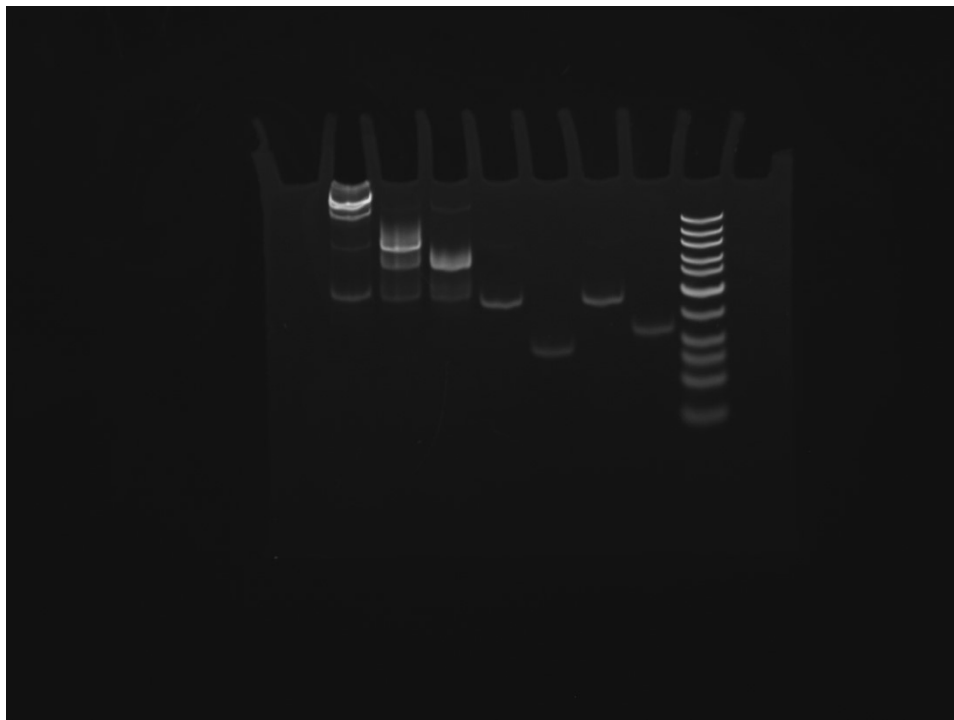

**Fig. S2.** The original image of Figure 2B in the paper

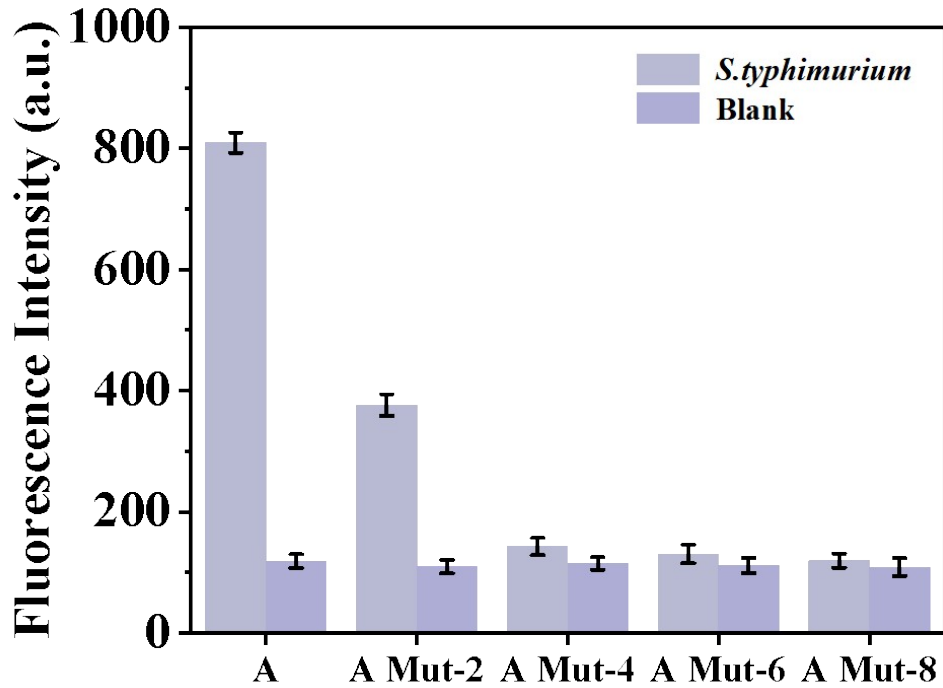

Fig. S3. Verification of mismatched sequences in Stand A

Table 1: The oligonucleotide sequences used in this study

| DNA name | Sequence (5' to 3')                                                                                         |
|----------|-------------------------------------------------------------------------------------------------------------|
| Apt      | CTCCTCTGACTGTAACCACGGTGGTTTGATCACTATTGGGCCTTTGTGATGTCGGT<br>AGT <sup>[40]</sup>                             |
| A        | ACCGAGCCACTACCGACATCACAAAGGCCCTGACGAACGGTT <sup>[40]</sup>                                                  |
| AB       | ACCGAGCCACTACCGACATCACAAAGGCCCTGACGAACGGTTG/rA/T<br>AATGACGAACTCCTCCTTATGATTTGTGATGTCGGTAGT                 |
| DNAzyme  | AACAATCAAACCGTTCGTCAGGGCCTTTGTGATGTCGGTAGTGGCTCGGACCCCTC<br><u>CGAGCCGGTCGTCGAAACTCTCTCGAACTATTTGATTGTT</u> |
| H1       | ACTACCGACATCACAAATCATAAGGAGGAGTTCGTCATTAGGGCGGC<br>CTTTGTGATGTCGGGCTGAGCTTTAAAGCAA                          |
| H2       | CGGCCTTTGTTTCAGACTTAGGAACCGACATCACAAAGGCCGCC                                                                |
| H3       | BHQ1-GGTTTTGCTTTAAAGCTCAGCCCGTT-FAM-CCTAAGTCTGAAC<br>AAAGGCCGACTACCGACATCATCTGAGCTTTAAAG                    |
| crRNA    | UUGCUIUAAAGCUGCUAGAUGUGAAUCAUCUIUAAUU                                                                       |

**Table 2: Comparison of different S.typhimurium detection methods**

| Detection method    | Limit of detection (LOD, cfu/mL) | Detection range (cfu/mL)  | Assay time | References |
|---------------------|----------------------------------|---------------------------|------------|------------|
| Microfluidic sensor | 63                               | $10^2 \sim 10^7$          | 1.5 h      | 1          |
| Colorimetric        | 11                               | $10 \sim 10^4$            | 2.5 h      | 2          |
| Fluorescence        | 82                               | $50 \sim 10^7$            | 3h50min    | 3          |
| Electrochemical     | 100                              | $25 \sim 1.0 \times 10^5$ | 20 min     | 4          |
| This study          | 6.26                             | $10 \sim 1 \times 10^5$   | 60 min     |            |

## References

- (1) Lin, X.; Li, C.; Meng, X.; Yu, W.; Duan, N.; Wang, Z.; Wu, S. CRISPR-Cas12a-mediated luminescence resonance energy transfer aptasensing platform for deoxynivalenol using gold nanoparticle-decorated Ti3C2Tx MXene as the enhanced quencher. *JOURNAL OF HAZARDOUS MATERIALS* **2022**, *433*, Article. DOI: 10.1016/j.jhazmat.2022.128750 .
- (2) Jiang, H.; Jiang, D.; Liu, X.; Yang, J. A self-driven PET chip-based imprinted electrochemical sensor for the fast detection of Salmonella. *SENSORS AND ACTUATORS B-CHEMICAL* **2021**, *349*, Article. DOI: 10.1016/j.snb.2021.130785.
- (3) Wang, H.; Wu, Q.; Zhou, M.; Li, C.; Yan, C.; Huang, L.; Qin, P. Development of a CRISPR/Cas9-integrated lateral flow strip for rapid and accurate detection of Salmonella. *FOOD CONTROL* **2022**, *142*, Article. DOI: 10.1016/j.foodcont.2022.109203.
- (4) Wang, L.; Qi, W.; Wang, M.; Jiang, F.; Ding, Y.; Xi, X.; Liao, M.; Li, Y.; Lin, J. A pipette-adapted biosensor for Salmonella detection. *BIOSENSORS & BIOELECTRONICS* **2022**, *218*, Article. DOI: 10.1016/j.bios.2022.114765.
